# Supplementary material for: High cytotoxicity of dihalo-substituted 8-quinolinolato-lanthanides
Source: Royal Society of Chemistry journal article supplement (doi:10.1039/c0dt01310b), 2011-01-01
Supplement: c0dt01310b.pdf [file c0dt01310b.pdf]

## Electronic supplementary information (ESI)

### High cytotoxicity of halogen substituted 8-quinolinolato-lanthanides

Zhen-Feng Chen, Xiao-Yan Song, Yan Peng, Xue Hong, Yan-Cheng Liu, Hong Liang

Table S1. Selected bond lengths(Å) and angles (°) for complex **2**

|                 |            |                 |            |
|-----------------|------------|-----------------|------------|
| Dy(1)-O(3)      | 2.312(4)   | O(3)-Dy(1)-O(1) | 78.64(13)  |
| Dy(1)-O(1)      | 2.338(4)   | O(3)-Dy(1)-O(2) | 131.19(13) |
| Dy(1)-O(2)      | 2.344(4)   | O(1)-Dy(1)-O(2) | 124.88(14) |
| Dy(1)-O(5)      | 2.366(5)   | O(3)-Dy(1)-O(5) | 122.49(17) |
| Dy(1)-O(4)      | 2.395(4)   | O(1)-Dy(1)-O(5) | 134.04(15) |
| Dy(1)-N(2)      | 2.479(5)   | O(2)-Dy(1)-O(5) | 74.43(14)  |
| Dy(1)-N(1)      | 2.525(5)   | O(3)-Dy(1)-O(4) | 81.20(14)  |
| Dy(1)-N(3)      | 2.569(5)   | O(1)-Dy(1)-O(4) | 76.89(14)  |
| O(2)-Dy(1)-O(4) | 140.73(13) | O(5)-Dy(1)-O(4) | 68.30(15)  |
| O(3)-Dy(1)-N(2) | 81.68(14)  | O(1)-Dy(1)-N(2) | 76.34(14)  |
| O(2)-Dy(1)-N(2) | 66.95(14)  | O(5)-Dy(1)-N(2) | 140.98(15) |
| O(4)-Dy(1)-N(2) | 150.53(14) | O(3)-Dy(1)-N(1) | 143.85(14) |
| O(1)-Dy(1)-N(1) | 65.71(14)  | O(2)-Dy(1)-N(1) | 77.82(14)  |
| O(5)-Dy(1)-N(1) | 81.87(18)  | O(4)-Dy(1)-N(1) | 85.01(15)  |
| N(2)-Dy(1)-N(1) | 95.01(16)  | O(3)-Dy(1)-N(3) | 65.46(14)  |
| O(1)-Dy(1)-N(3) | 142.30(14) | O(2)-Dy(1)-N(3) | 76.11(14)  |
| O(5)-Dy(1)-N(3) | 78.33(17)  | O(4)-Dy(1)-N(3) | 107.15(15) |
| N(2)-Dy(1)-N(3) | 87.07(15)  | N(1)-Dy(1)-N(3) | 150.63(15) |

Table S2. Selected bond lengths(Å) and angles (°) for complex **3**

|                 |            |                 |            |
|-----------------|------------|-----------------|------------|
| Er(1)-O(2)      | 2.288(4)   | O(2)-Er(1)-O(1) | 78.10(16)  |
| Er(1)-O(1)      | 2.325(4)   | O(2)-Er(1)-O(3) | 131.95(16) |
| Er(1)-O(3)      | 2.333(4)   | O(1)-Er(1)-O(3) | 125.32(17) |
| Er(1)-O(5)      | 2.354(6)   | O(2)-Er(1)-O(5) | 121.8(2)   |
| Er(1)-O(4)      | 2.360(5)   | O(1)-Er(1)-O(5) | 134.50(19) |
| Er(1)-N(3)      | 2.453(6)   | O(3)-Er(1)-O(5) | 74.26(17)  |
| Er(1)-N(1)      | 2.496(6)   | O(2)-Er(1)-O(4) | 80.47(17)  |
| Er(1)-N(2)      | 2.555(6)   | O(1)-Er(1)-O(4) | 77.04(17)  |
| O(3)-Er(1)-O(4) | 140.42(16) | O(5)-Er(1)-O(4) | 68.16(17)  |
| O(2)-Er(1)-N(3) | 81.26(18)  | O(1)-Er(1)-N(3) | 76.14(17)  |
| O(3)-Er(1)-N(3) | 68.02(17)  | O(5)-Er(1)-N(3) | 141.69(17) |
| O(4)-Er(1)-N(3) | 150.09(17) | O(2)-Er(1)-N(1) | 143.83(17) |
| O(1)-Er(1)-N(1) | 66.39(17)  | O(3)-Er(1)-N(1) | 77.72(17)  |
| O(5)-Er(1)-N(1) | 81.9(2)    | O(4)-Er(1)-N(1) | 85.01(19)  |
| N(3)-Er(1)-N(1) | 96.2(2)    | O(2)-Er(1)-N(2) | 65.80(17)  |

|                 |            |                 |            |
|-----------------|------------|-----------------|------------|
| O(1)-Er(1)-N(2) | 142.04(17) | O(3)-Er(1)-N(2) | 76.12(17)  |
| O(5)-Er(1)-N(2) | 77.8(2)    | O(4)-Er(1)-N(2) | 106.80(19) |
| N(3)-Er(1)-N(2) | 86.80(19)  | N(1)-Er(1)-N(2) | 150.36(17) |

---

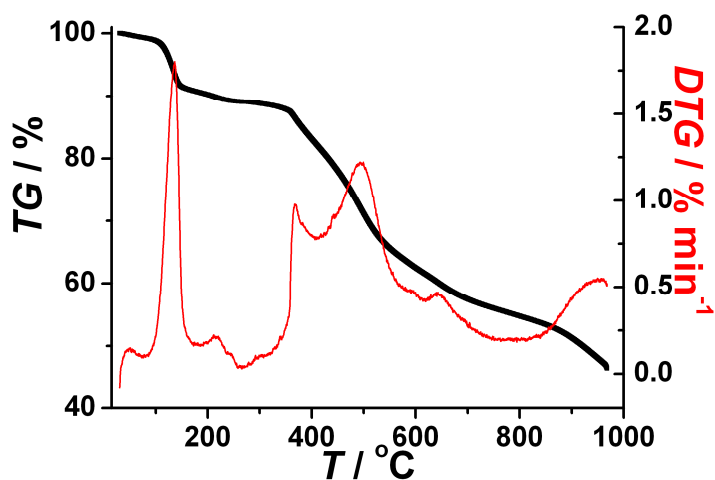

(complex 1)

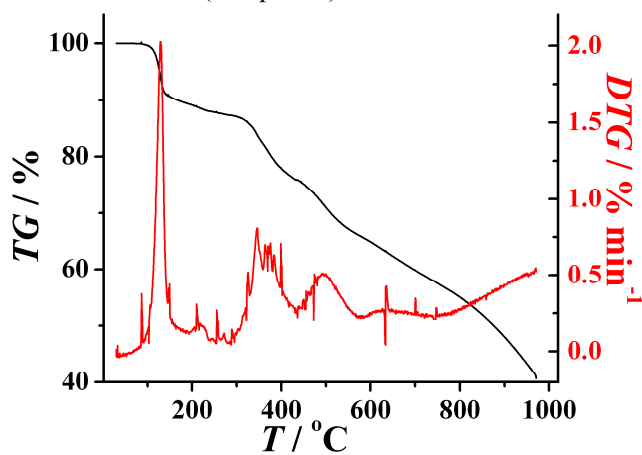

(complex 2)

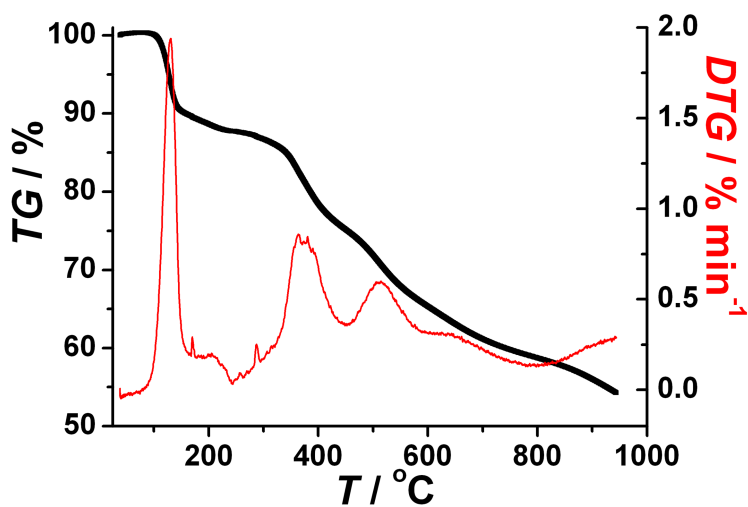

(complex 3)

Figure S1. TGA drawing of complexes 1-3.

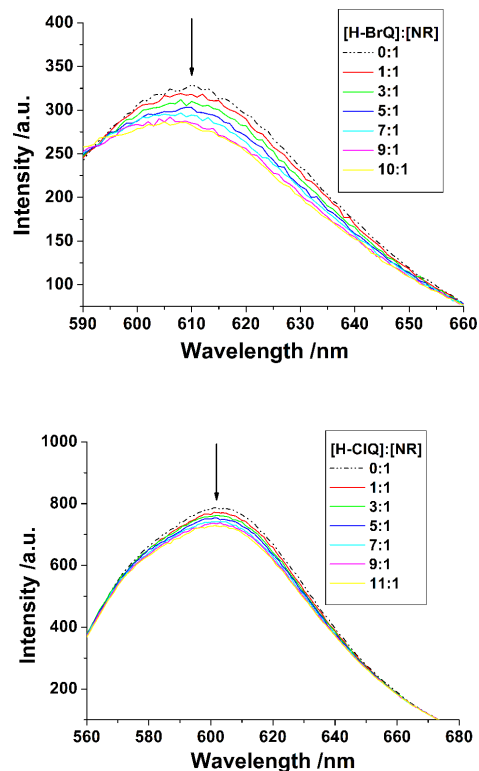

Figure S2. Emission spectra of DNA–NR system ( $[DNA] = 1.0 \times 10^{-4}$  M,  $[NR] = 1.0 \times 10^{-5}$  M) in the absence (----) and presence (—) of H-BrQ and H-CIQ with increasing concentrations range from  $1.0 \times 10^{-5}$  M to  $1.1 \times 10^{-4}$  M

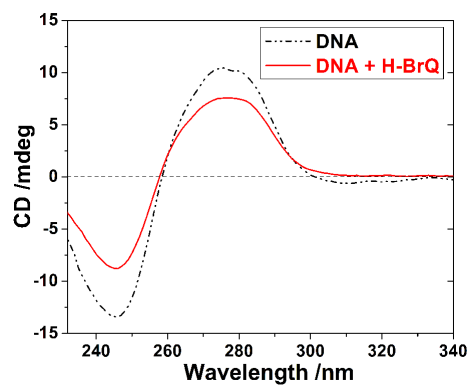

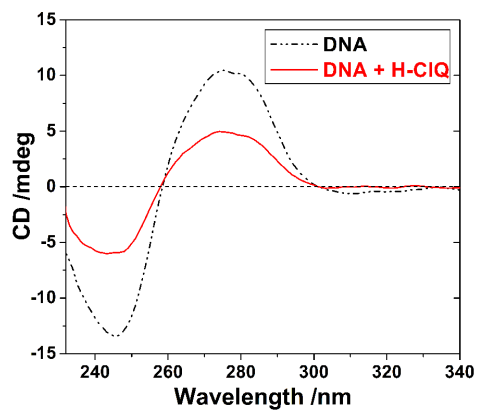

Figure S3. Circular dichroism spectra of H-BrQ and H-ClQ bound with ct-DNA
